# Supplementary material for: Epigallocatechin-3-gallate and 6-OH-11-O-Hydroxyphenanthrene Limit BE(2)-C Neuroblastoma Cell Growth and Neurosphere Formation In Vitro
Source: MDPI journal article supplement (doi:10.3390/nu10091141), 2018-08-22
Supplement: s1 [file s1]

Supplementary **Table 2.** Primer sequences for qPCR

| Gene                          | Sequence                                                           | Annealing t °C | Base pair |
|-------------------------------|--------------------------------------------------------------------|----------------|-----------|
| <b>RXR<math>\alpha</math></b> | F5'-CAAGGACTGCCTGATTGACA-3'<br>R5'-CGACTCCACCTCATTCTCGT-3'         | 56             | 145       |
| <b>RXR<math>\beta</math></b>  | F5'-GGTTTGCCAAGCTGCTGCT-3'<br>R5'-CATCTCCATGAGGAAGGTGT-3'          | 56             | 122       |
| <b>GAPDH</b>                  | F5'-GCAGGGATGATGTTCTGGAG-3'<br>R5'-TGGTATCGTGGAAGGACTCATGAC-3      | 56             | 123       |
| <b>RAR<math>\alpha</math></b> | F5'-TGGGTGGACTCTCCCCGCCA-3'<br>R5'-CCCACCTCCGGCGTCAGCGTG-3'        | 60             | 460       |
| <b>RAR<math>\beta</math></b>  | F5'- CACTGGCTTGACCATCGCAGACC-3'<br>R5'- GAGAGGTGGCATTGATCCAGG-3'   | 64             | 481       |
| <b>RAR<math>\gamma</math></b> | F5'- GGCCTGGGCCAGCCTGACCTC-3'<br>R5'- GAGCCCCAGATCCAGCTGCACG-3'    | 64             | 537       |
| <b>N-MYC</b>                  | F5'- GTCACCACATTACCATCAC-3'<br>R5'- GGGAAGGCATCGTTTGAG-3'          | 60             | 96        |
| <b>MMP-2</b>                  | F5'-ATCACATACAGGATCATTGGCTAC-3'<br>R5'- TGATGTCTGCCTCTCCATCA-3'    | 63             | 139       |
| <b>MMP-9</b>                  | F5'-ACGCCGCTCACCTTCACTC-3'<br>R5'-GGACCACAACCTCGTCATCGTC-3'        | 63             | 180       |
| <b>COX-2</b>                  | F5'-CCTGTGCCTGATGATTGC-3'<br>R5'-CTGATGCGTGAAGTGCTG                | 60             | 162       |
| <b>Actin</b>                  | F5'-GGCATCCACGAAACTACCTTCAAC-3'<br>R5'-AGTGATCTCCTTCTGCATCCTGTC-3' | 60             | 138       |
