# Supplementary material for: Epigallocatechin-3-gallate and 6-OH-11-O-Hydroxyphenanthrene Limit BE(2)-C Neuroblastoma Cell Growth and Neurosphere Formation In Vitro
Source: MDPI journal article supplement (doi:10.3390/nu10091141), 2018-08-22
Supplement: s1 [file s1]

Supplementary **Table 1.** Primer sequences for RT-PCR

| Gene           | Sequence                        | Annealing t °C | Base pair |
|----------------|---------------------------------|----------------|-----------|
| <b>β-actin</b> | F5'-ATCGTGCGTGACATTAAGGAGAAG-3' | 60             | 179       |
|                | R5'-AGGAAGGAAGGCTGGAAGAGTG-3'   |                |           |
| <b>EGFR</b>    | F5'- CTGACGCAGTTGGGCACTTT-3'    | 60             | 301       |
|                | R5'-TCATGGGCAGCTCCTTCAGT-3'     |                |           |
| <b>NDRG1</b>   | F5'-CTCTGTTCACGTCACGCTGT-3'     | 60             | 104       |
|                | R5'-AGAGGGGGTTGTAGCAGGTT-3'     |                |           |
