# Supplementary material for: Epigallocatechin-3-gallate and 6-OH-11-O-Hydroxyphenanthrene Limit BE(2)-C Neuroblastoma Cell Growth and Neurosphere Formation In Vitro
Source: MDPI journal article supplement (doi:10.3390/nu10091141), 2018-08-22
Supplement: s1 [file s1]

Supplementary **Table 3.** Combination Index (CI)

|         | IIF 10 | Time |
|---------|--------|------|
| EGCG 20 | >1     | 24 h |
| EGCG 20 | <1     | 48 h |
| EGCG 20 | <1     | 72 h |

**Supplementary Table 3.** Synergy evaluation of EGCG ( $\mu\text{g/mL}$ ) and IIF ( $\mu\text{M}$ ) treatment effects with the combination index (CI). MTT assay data in BE(2)-C cells, after 24-48-72 h treatment, were used to calculate additive ( $=1$ ), synergistic ( $<1$ ) or antagonistic ( $>1$ ) effects as described in Materials and Methods.
