# Supplementary material for: Epigallocatechin-3-gallate and 6-OH-11-O-Hydroxyphenanthrene Limit BE(2)-C Neuroblastoma Cell Growth and Neurosphere Formation In Vitro
Source: Nutrients. 2018 Aug 22;10(9):1141. doi: 10.3390/nu10091141 (PMC6164794; doi:10.3390/nu10091141)
Supplement: Supplementary file 1 [file nutrients-10-01141-s001.zip]

Archive with 5 entries (5 files):
- Supp.Fig.1.Tif
- Supplementary Table 1.pdf
- Supplementary Table 2.pdf
- Supplementary Table 3.pdf
- Supplementary Table 4.pdf
